# Supplementary material for: Improvement in the sensitivity of LA-ICP-MS bioimaging by addition of nitrogen to the argon carrier gas
Source: Royal Society of Chemistry journal article supplement (doi:10.1039/d3ja00467h), 2024-01-01
Supplement: d3ja00467h1.pdf [file d3ja00467h1.pdf]

## Supplementary Methods

Limits of detection were calculated from the standard deviation of the gelatine standard blank ( $\sigma_B$ ) and the slope of the calibration curve ( $S$ ) for elements with a mean blank count greater than five.

$$LOD = \frac{3\sigma_B}{S}$$

For elements with a mean blank count ( $N_B$ ) below ten and above zero,<sup>1</sup> Poisson statistics were used.<sup>2</sup>

$$LOD = \frac{2.33}{S} \sqrt{N_B}$$

Supplementary Table 1. Linearity of the matrix-matched gelatine standards when measured using the addition of 0 and 8 ml min<sup>-1</sup> of nitrogen.

| Element | r <sup>2</sup> (0 ml min <sup>-1</sup> ) | r <sup>2</sup> (8 ml min <sup>-1</sup> ) | Element | r <sup>2</sup> (0 ml min <sup>-1</sup> ) | r <sup>2</sup> (8 ml min <sup>-1</sup> ) |
|---------|------------------------------------------|------------------------------------------|---------|------------------------------------------|------------------------------------------|
| Al      | 0.9954                                   | 0.9979                                   | Ba      | 0.9996                                   | 0.9998                                   |
| Sc      | 0.9997                                   | 0.9997                                   | La      | 0.9994                                   | 0.9990                                   |
| Ti      | 0.9957                                   | 0.9948                                   | Ce      | 0.9995                                   | 0.9996                                   |
| Cr      | 0.9988                                   | 0.9986                                   | Pr      | 0.9986                                   | 0.9989                                   |
| Mn      | 0.9994                                   | 0.9846                                   | Nd      | 0.9998                                   | 0.9998                                   |
| Fe      | 0.9859                                   | 0.9907                                   | Sm      | 0.9998                                   | 0.9996                                   |
| Co      | 0.9998                                   | 0.9996                                   | Eu      | 0.9999                                   | 0.9995                                   |
| Ni      | 0.9994                                   | 0.9992                                   | Gd      | 0.9988                                   | 0.9997                                   |
| Cu      | 0.9984                                   | 0.9984                                   | Tb      | 0.9988                                   | 0.9992                                   |
| Zn      | 0.9711                                   | 0.9736                                   | Dy      | 0.9997                                   | 0.9995                                   |
| Ga      | 0.9997                                   | 0.9997                                   | Ho      | 0.9987                                   | 0.9979                                   |
| Ge      | 0.9862                                   | 0.9841                                   | Er      | 0.9994                                   | 0.9994                                   |
| As      | 0.9998                                   | 0.9998                                   | Tm      | 0.9989                                   | 0.9984                                   |
| Se      | 0.9970                                   | 0.9971                                   | Yb      | 0.9996                                   | 0.9990                                   |
| Sr      | 0.9997                                   | 0.9997                                   | Lu      | 0.9990                                   | 0.9989                                   |
| Y       | 0.9998                                   | 0.9997                                   | Hf      | 0.9947                                   | 0.9963                                   |
| Zr      | 0.9935                                   | 0.9959                                   | Ta      | 0.9536                                   | 0.9602                                   |
| Nb      | 0.9961                                   | 0.9959                                   | W       | 0.9986                                   | 0.9985                                   |
| Mo      | 0.9988                                   | 0.9997                                   | Re      | 0.9997                                   | 0.9992                                   |
| Ru      | 0.9917                                   | 0.9898                                   | Os      | 0.9940                                   | 0.9824                                   |
| Rh      | 0.9951                                   | 0.9924                                   | Ir      | 0.9892                                   | 0.9855                                   |
| Ag      | 0.9969                                   | 0.9972                                   | Pt      | 0.9906                                   | 0.9844                                   |
| Cd      | 0.9973                                   | 0.9950                                   | Tl      | 0.9998                                   | 0.9996                                   |
| In      | 0.9998                                   | 0.9996                                   | Pb      | 0.9995                                   | 0.9992                                   |
| Sn      | 0.9841                                   | 0.9856                                   | Bi      | 0.9996                                   | 0.9993                                   |
| Sb      | 0.9994                                   | 0.9995                                   | Th      | 0.9998                                   | 0.9999                                   |
| Te      | 0.9930                                   | 0.9955                                   | U       | 0.9995                                   | 0.9993                                   |

Supplementary Table 2. List of antibodies, their clone and manufacturers, and isotopic label.

| antibody           | Clone                   | manufacturer                 | Isotopic label |
|--------------------|-------------------------|------------------------------|----------------|
| DNA intercalator   |                         | Fluidigm (Cat. No.: 201103A) | Rh103          |
| Alpha1-syntrophin  | EPR14828                | Abcam                        | Nd144          |
| Alpha-dystroglycan | IIH6                    | Santa Cruz Biotechnology     | Sm152          |
| Gamma-sarcoglycan  | n/a (Rabbit polyclonal) | GeneTex                      | Eu153          |
| Anti-dystrophin    | Mandys8                 | Santa Cruz Biotechnology     | Gd158          |
| Alpha-dystroglycan | VIA41                   | Santa Cruz Biotechnology     | Tb159          |
| nNOS               | EP1855Y                 | Abcam                        | Ho165          |
| Myosin, fast       | MY-32                   | Abcam                        | Tm169          |
| Sarcospan          | E2                      | Santa Cruz Biotechnology     | Yb173          |
| Alpha2-laminin     | 4H8-2                   | Abcam                        | Yb176          |

Supplementary Table 3: Matrix-matched gelatine standard concentrations.

| Level | Concentration (mg/kg) |      |      |      |      |      |      |      |      |      |      |      |      |      |      |      |      |      |
|-------|-----------------------|------|------|------|------|------|------|------|------|------|------|------|------|------|------|------|------|------|
|       | Al                    | Sc   | Ti   | Cr   | Mn   | Fe   | Co   | Ni   | Cu   | Zn   | Ga   | Ge   | As   | Se   | Sr   | Y    | Zr   | Nb   |
| Blank | 4.1                   | 0.09 | 2.69 | 0.92 | 0.05 | 1.76 | 0.01 | 0.13 | 0.18 | 1.19 | 0    | 0.22 | 0    | 0.22 | 0.14 | 0    | 0.11 | 0.1  |
| 1     | 5.65                  | 0.97 | 3.77 | 1.74 | 1.01 | 3.73 | 0.97 | 1.17 | 1.33 | 4.3  | 1.01 | 1.06 | 0.93 | 1.69 | 1.11 | 0.97 | 1.01 | 0.89 |
| 2     | 7.83                  | 3.84 | 6.57 | 4    | 3.75 | 5.96 | 3.77 | 3.98 | 4.48 | 5.2  | 3.88 | 3.88 | 3.88 | 4.3  | 3.84 | 3.74 | 3.89 | 3.59 |
| 3     | 13                    | 8.6  | 10.9 | 8.45 | 8.5  | 11.8 | 8.56 | 8.94 | 9.13 | 9.99 | 8.87 | 8.09 | 9.08 | 9.17 | 8.61 | 8.49 | 8.29 | 7.68 |
| 4     | 17.1                  | 12.8 | 14.3 | 13   | 13   | 15.9 | 13.1 | 13.8 | 13.9 | 14.7 | 13.7 | 11.4 | 14.2 | 14.3 | 13.1 | 13.2 | 11.7 | 11   |
| 5     | 25.3                  | 19.9 | 23.6 | 21.1 | 21.3 | 25   | 21.4 | 22.3 | 22.8 | 24   | 22.5 | 19.8 | 23.2 | 23   | 21.4 | 21.4 | 20.3 | 19.3 |
|       | Mo                    | Ru   | Rh   | Ag   | Cd   | In   | Sn   | Sb   | Te   | Ba   | La   | Ce   | Pr   | Nd   | Sm   | Eu   | Gd   | Tb   |
| Blank | 0.02                  | 0.02 | 0.05 | 0    | 0    | 0    | 0    | 0.05 | 0.02 | 0.07 | 0    | 0    | 0    | 0    | 0    | 0    | 0    | 0    |
| 1     | 0.96                  | 5.22 | 5.03 | 0.87 | 0.99 | 0.99 | 0.96 | 1.13 | 0.95 | 1.08 | 0.95 | 0.96 | 0.96 | 0.99 | 0.99 | 0.93 | 0.97 | 0.94 |
| 2     | 3.96                  | 13.2 | 12.6 | 3.74 | 3.82 | 3.82 | 3.7  | 4.13 | 3.97 | 3.88 | 3.67 | 3.68 | 3.68 | 3.77 | 3.77 | 3.63 | 3.77 | 3.62 |
| 3     | 8.47                  | 33.7 | 32.1 | 7.99 | 8.61 | 8.61 | 8.3  | 8.61 | 8.48 | 8.78 | 8.29 | 8.28 | 8.3  | 8.55 | 8.57 | 8.17 | 8.46 | 8.14 |
| 4     | 11.9                  | 42   | 41.4 | 11.3 | 13.3 | 13.3 | 12.8 | 12.2 | 12.1 | 13.4 | 13.2 | 13.4 | 13.4 | 13.2 | 13.1 | 12.5 | 13.1 | 13.3 |
| 5     | 20.8                  | 57.6 | 60.7 | 19.7 | 21.6 | 21.6 | 22.1 | 21.2 | 20.7 | 21.9 | 22   | 22   | 22   | 21.5 | 21.5 | 20.4 | 21.4 | 21.7 |
|       | Dy                    | Ho   | Er   | Tm   | Yb   | Lu   | Hf   | Ta   | W    | Re   | Os   | Ir   | Pt   | Tl   | Pb   | Bi   | Th   | U    |
| Blank | 0                     | 0    | 0    | 0    | 0    | 0    | 0.04 | 0.01 | 0.04 | 0    | 0.46 | 0.1  | 0.02 | 3.75 | 0.04 | 0.02 | 0    | 0    |
| 1     | 0.93                  | 0.94 | 0.94 | 0.94 | 0.99 | 0.93 | 0.91 | 0.76 | 0.95 | 0.93 | 8.81 | 5.51 | 5.92 | 2.62 | 0.77 | 0.96 | 0.9  | 0.63 |
| 2     | 3.58                  | 3.59 | 3.68 | 3.64 | 3.79 | 3.61 | 3.81 | 3.06 | 3.93 | 3.53 | 22.2 | 13.7 | 15   | 2.37 | 3.92 | 3.59 | 3.51 | 3.01 |
| 3     | 8.06                  | 8.09 | 8.26 | 8.17 | 8.53 | 8.14 | 8.13 | 5.9  | 8.46 | 7.94 | 56.4 | 33.9 | 37.2 | 4.57 | 9.25 | 7.98 | 7.96 | 7.27 |
| 4     | 12.4                  | 13.2 | 12.6 | 13.4 | 13.1 | 13.3 | 11.5 | 6.9  | 12   | 12.2 | 69   | 41.3 | 45.6 | 5.9  | 14.4 | 12.2 | 12.2 | 11.4 |
| 5     | 20.2                  | 21.4 | 20.6 | 21.9 | 21.4 | 21.8 | 20   | 12.2 | 20.8 | 20   | 98.4 | 64.4 | 65.4 | 9.2  | 23.6 | 20.1 | 21.3 | 20.2 |

Supplementary Table 4: Mean signal intensity and standard deviations for all endogenous elements investigated across the murine brain section.

| Element | N2 Flow (ml/min) | Signal Mean | %RSD |
|---------|------------------|-------------|------|
| Na23    | 0                | 632582.0    | 10   |
|         | 8                | 1206924.3   | 15   |
| Mg24    | 0                | 5613.7      | 28   |
|         | 8                | 10830.8     | 45   |
| P31     | 0                | 4672.8      | 8    |
|         | 8                | 24534.7     | 11   |
| Mn55    | 0                | 185.1       | 27   |
|         | 8                | 11965.6     | 9    |
| Fe56    | 0                | 5193.5      | 43   |
|         | 8                | 15321.1     | 43   |
| Ni60    | 0                | 2.7         | 1727 |
|         | 8                | 7.1         | 2023 |
| Cu63    | 0                | 294.9       | 95   |
|         | 8                | 1026.7      | 147  |
| Zn66    | 0                | 599.4       | 40   |
|         | 8                | 1948.6      | 39   |
| Mo95    | 0                | 5.4         | 65   |
|         | 8                | 11.3        | 59   |

Supplementary Table 5: Mean signal intensity and standard deviations for all elements investigated across the human quadriceps section.

| Element | N2 Flow (ml/min) | Signal Mean | %RSD |
|---------|------------------|-------------|------|
| Rh103   | 0                | 291.9       | 42   |
|         | 8                | 506.1       | 38   |
| Nd144   | 0                | 98.2        | 44   |
|         | 8                | 117.7       | 47   |
| Sm152   | 0                | 13.8        | 77   |
|         | 8                | 15.8        | 57   |
| Eu153   | 0                | 23.0        | 56   |
|         | 8                | 29.3        | 52   |
| Gd158   | 0                | 38.9        | 56   |
|         | 8                | 52.0        | 55   |
| Tb159   | 0                | 9.6         | 62   |
|         | 8                | 11.6        | 65   |
| Ho165   | 0                | 11.2        | 50   |
|         | 8                | 13.9        | 50   |
| Tm169   | 0                | 225.1       | 151  |
|         | 8                | 316.7       | 142  |
| Yb173   | 0                | 75.1        | 61   |
|         | 8                | 77.9        | 61   |
| Yb176   | 0                | 90.6        | 62   |
|         | 8                | 112.4       | 58   |

Supplementary Table 6: Limits of detection determined for elements with sufficient background counts at zero and optimal N<sub>2</sub> flow. Limits are calculated using the signal of the un-spiked gelatine standard and Gaussian or Poisson statistics where appropriate. \* = alternate flow as optimal flow of 0 ml/min.

| Element | N <sub>2</sub> Flow (ml/min) | LOD (mg/kg) |
|---------|------------------------------|-------------|
| Al      | 0                            | 1.3         |
|         | 6                            | 0.86        |
| Sc      | 0                            | 0.19        |
|         | *4                           | 0.34        |
| Cr      | 0                            | 0.20        |
|         | *4                           | 0.32        |
| Mn      | 0                            | 0.32        |
|         | *4                           | 8.3         |
| Fe      | 0                            | 0.55        |
|         | *4                           | 0.52        |
| Ni      | 0                            | 0.27        |
|         | 20                           | 0.14        |
| Cu      | 0                            | 0.81        |
|         | 20                           | 0.27        |
| Zn      | 0                            | 0.51        |
|         | 12                           | 0.26        |
| Ga      | 0                            | 0.21        |
|         | 8                            | 0.05        |
| As      | 0                            | 0.36        |
|         | 10                           | 0.12        |
| Se      | 0                            | 0.85        |
|         | *4                           | 0.79        |
| Sr      | 0                            | 0.14        |
|         | 12                           | 0.12        |
| Zr      | 0                            | 0.066       |
|         | 12                           | 0.048       |
| Sn      | 0                            | 0.19        |
|         | 12                           | 0.14        |
| Sb      | 0                            | 0.10        |
|         | 12                           | 0.069       |
| Ba      | 0                            | 0.29        |
|         | 6                            | 0.26        |

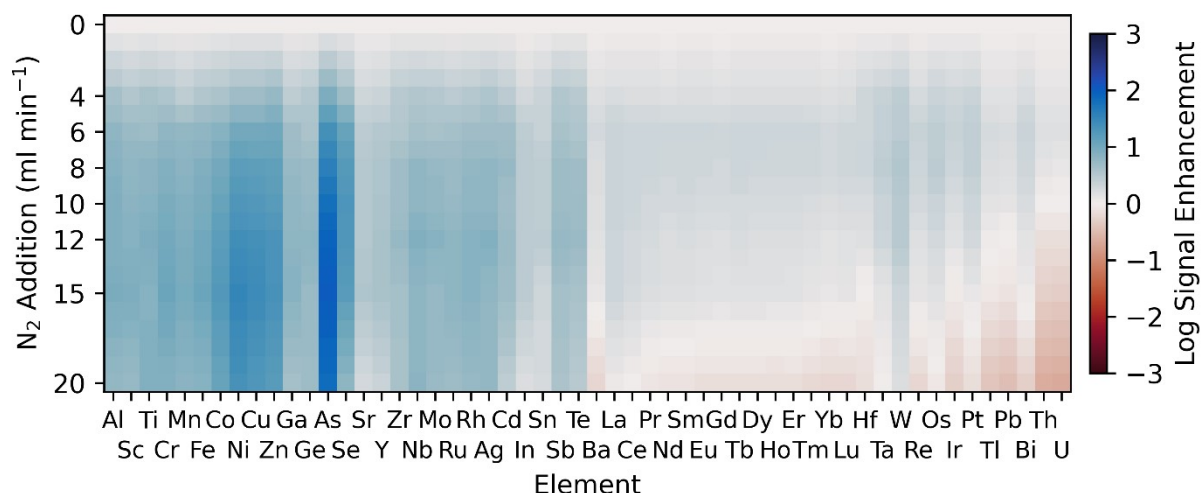

Supplementary Figure 1. Signal enhancement for measured elements at different nitrogen addition flow rates. Values between those measured (0, 4, 6, 8, 10, 12, 15 and 20 ml min<sup>-1</sup>) are interpolated at a 1 ml min<sup>-1</sup> step.

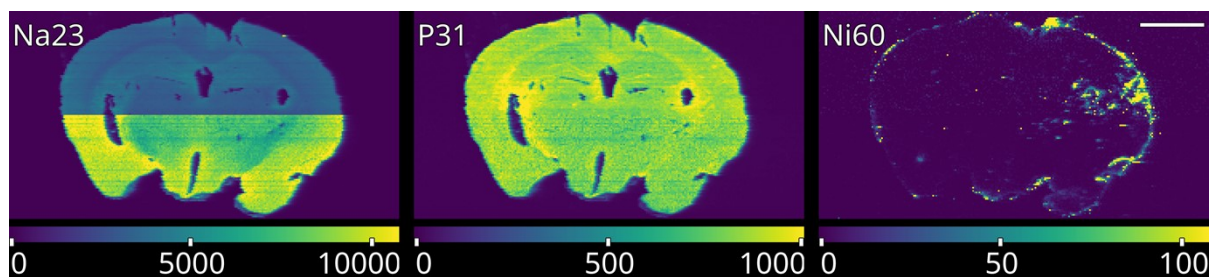

Supplementary Figure 2. Comparison of the nitrogen addition and standard method for analysing endogenous metals in mouse brain. The top half of each image was collected using standard conditions and the bottom half with 8 ml min<sup>-1</sup> nitrogen. Images were formed by dividing the signal collected with the mean background intensity, to show improvements in SNRs. Scale bar is 2 mm and image units signal/background.

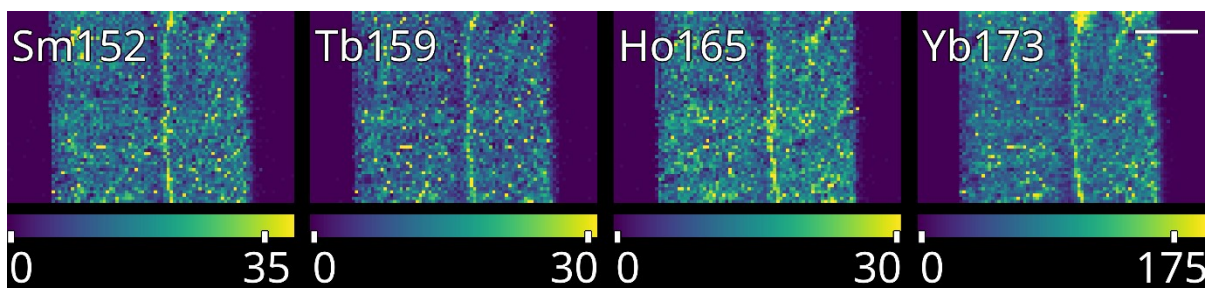

Supplementary Figure 3. Raw signal for multiplexed imaging of lanthanide tagged antibodies in murine quadriceps muscle tissue sections. The top half of each image was collected using standard conditions and the bottom half with 8 ml min<sup>-1</sup> nitrogen. Scale bar is 200 μm and the image units are in counts.

## Supplementary References

- 1 T. E. Lockwood, R. G. de Vega and D. Clases, An interactive Python-based data processing platform for single particle and single cell ICP-MS, *Journal of Analytical Atomic Spectrometry*, 2021, **36**, 2536–2544.
- 2 L. A. Currie, Limits for qualitative detection and quantitative determination. Application to radiochemistry, *Anal. Chem.*, 1968, **40**, 586–593.
